# Supplementary material for: Difficulty in inferring microbial community structure based on co-occurrence network approaches
Source: Springer Nature journal article supplement (doi:10.1186/s12859-019-2915-1), 2019-06-13
Supplement: 12859_2019_2915_MOESM1_ESM.pdf [file 12859_2019_2915_MOESM1_ESM.pdf]

**Supplementary information for “Difficulty in inferring  
microbial community structure based on co-occurrence  
network approaches”**

Hokuto Hirano and Kazuhiro Takemoto

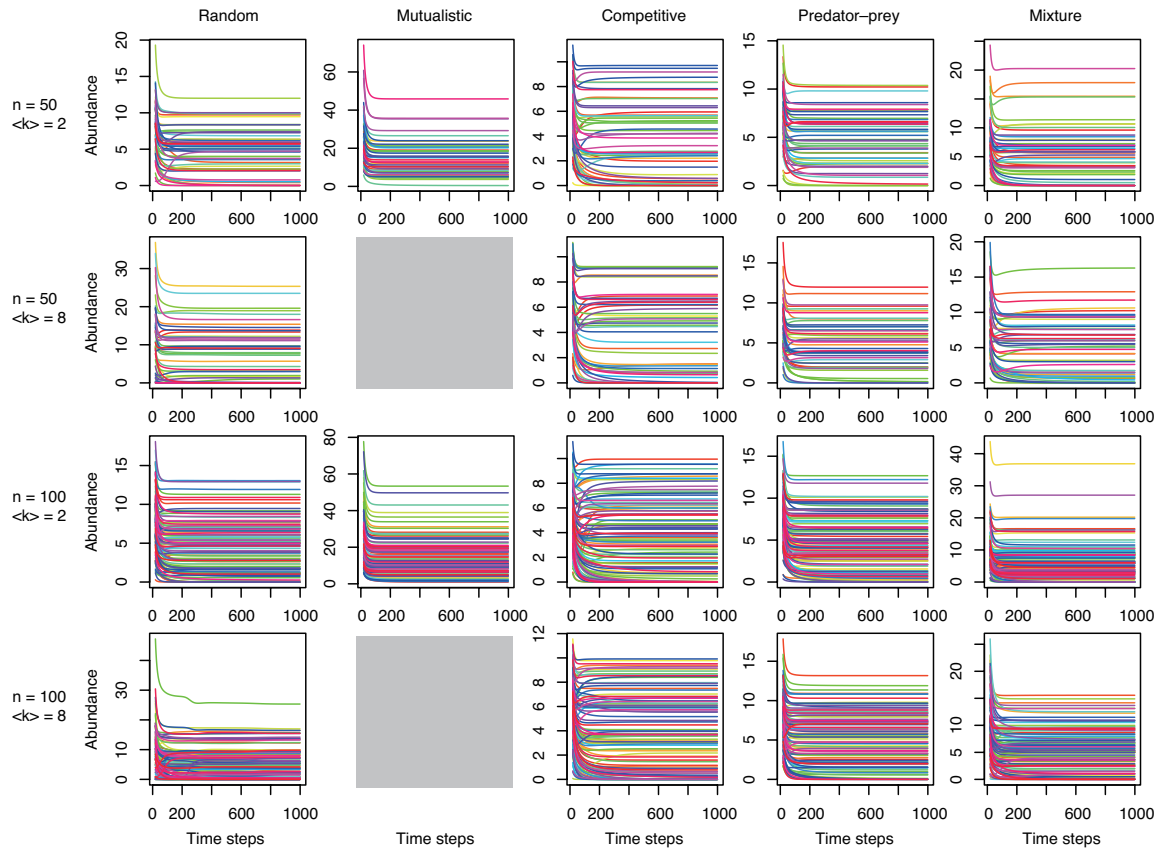

**Figure S1:** Examples of the dynamics of the GLV equations with random, mutualistic, competitive, predator-prey, and mixture of competition and mutualism interaction matrices.  $n$  and  $\langle k \rangle$  correspond to network size (the number of species) and average degree, respectively. Random network structure was considered.  $s_{\max}$  was set to 0.5. When  $\langle k \rangle = 8$ , mutualistic communities were not simulated due to numerical divergence in the simulation of the GLV equations. Tenfold abundances were displayed.

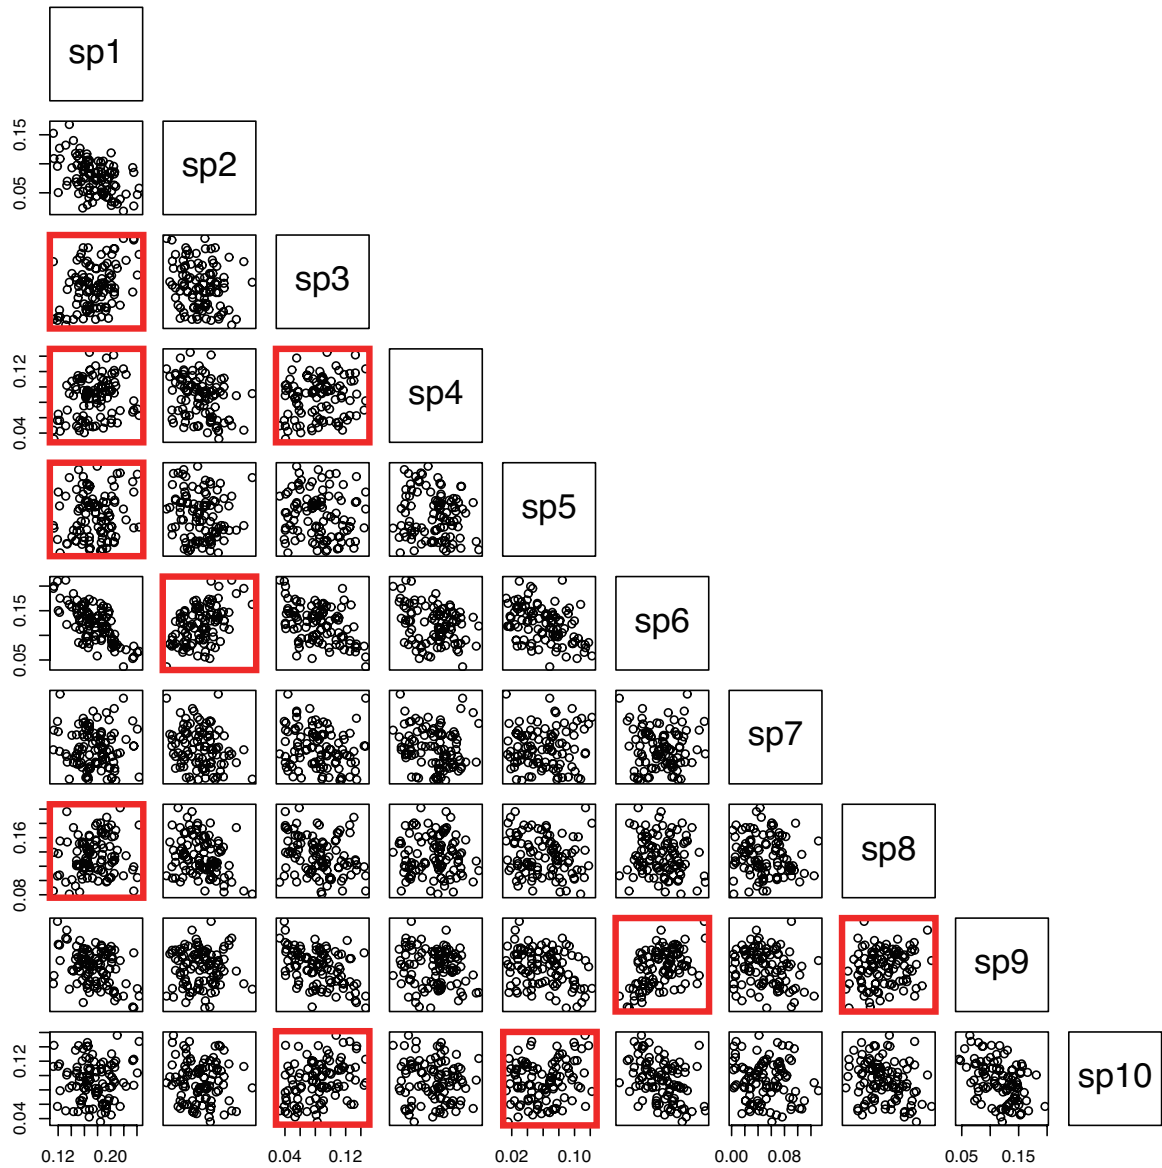

**Figure S2:** Example of correlations between species relative abundances generated from GLV equations. Mutualistic interaction matrices and random network structure with network size (the number of species)  $n = 10$  and average degree  $\langle k \rangle = 2$  were considered.  $s_{\max}$  was set to 0.5. The number of samples was set to 100.  $sp_i$  indicates species  $i$  ( $i = 1, \dots, 10$ ). Red boxed panels indicate connected species pairs (i.e.,  $A_{ij} = 1$ ).

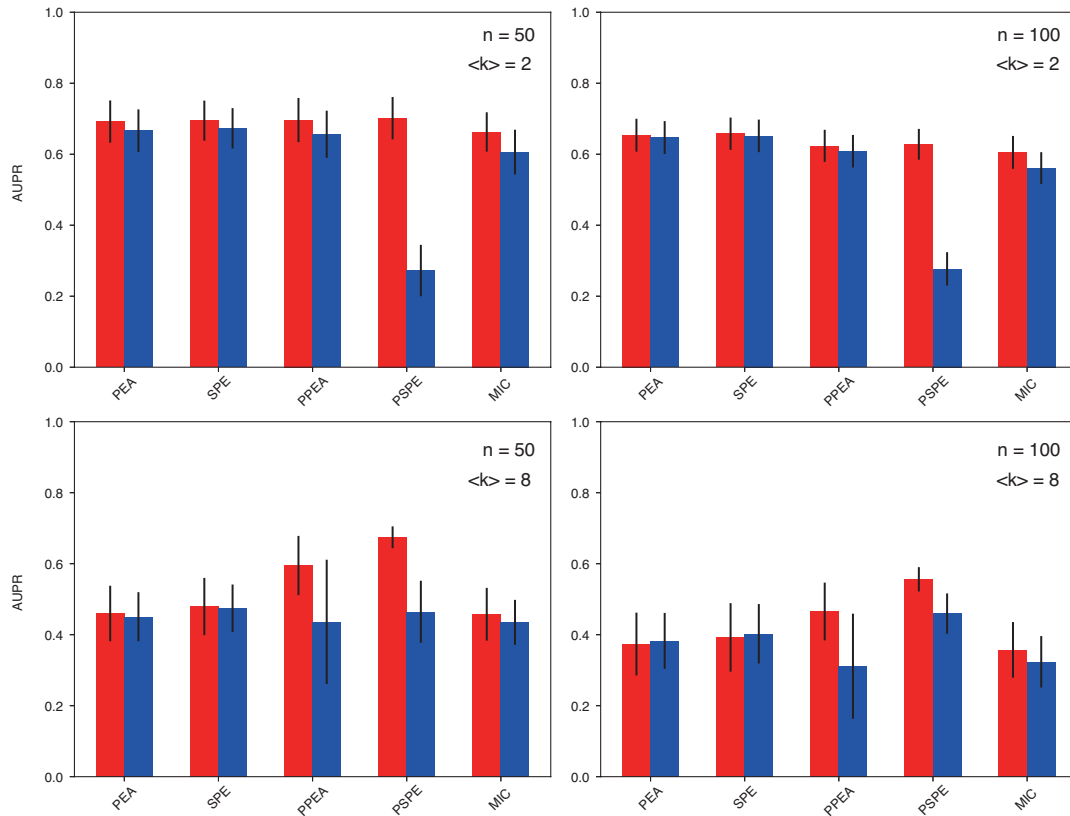

**Figure S3:** Comparison of the performance (AUPR value) of classical methods between using absolute abundances (red) and relative abundances (blue). Network size  $n = 50$  (left panels) and  $n = 100$  (right panels). Average degree  $\langle k \rangle = 2$  (top panels) and  $\langle k \rangle = 8$  (bottom panels). Random interaction matrices and random network structure were considered.  $s_{\max}$  was set to 0.5. The number of samples was set to 300. Error bars indicate standard deviations.

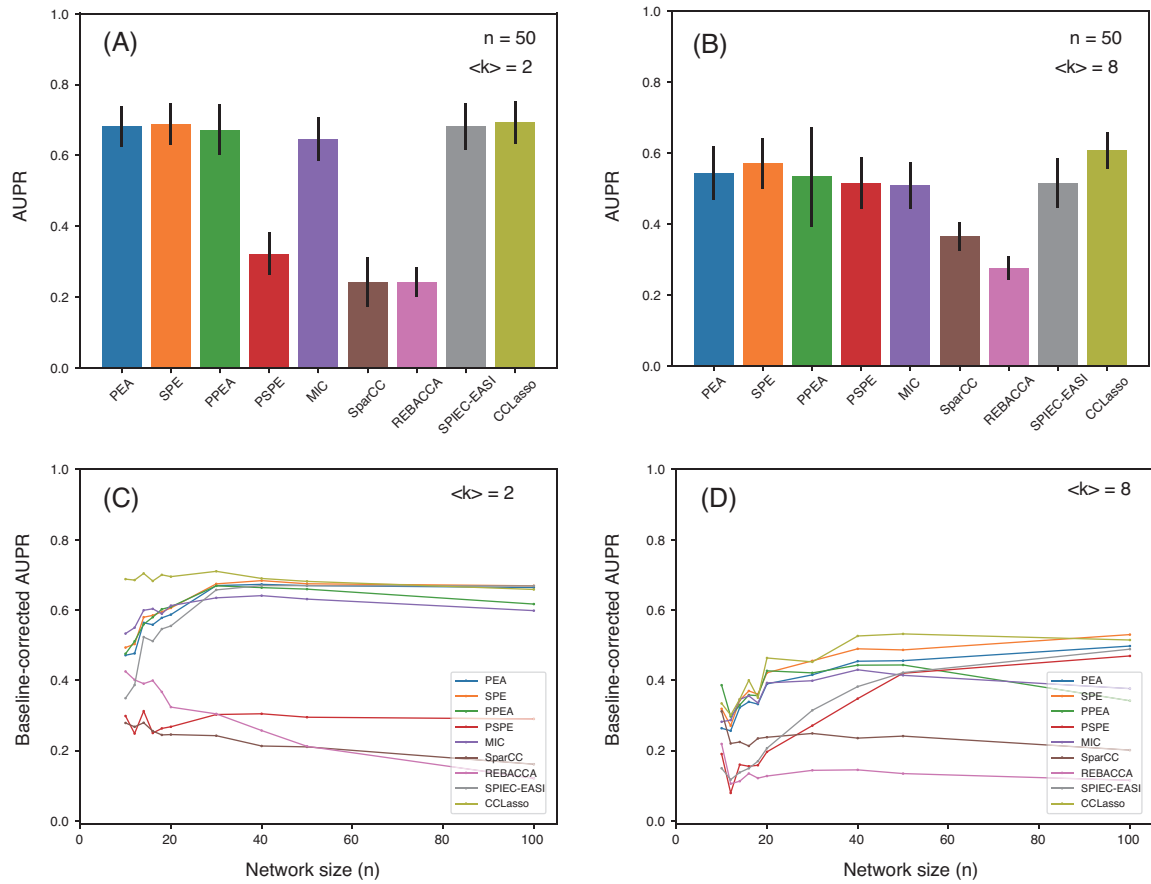

**Figure S4:** Differences in co-occurrence network performance between methods. AUPR values for 50-node networks with average degree  $\langle k \rangle = 2$  (A) and  $\langle k \rangle = 8$  (B) Error bars indicate standard deviations. Relationships between the baseline-corrected AUPR value and network size  $n$  for  $\langle k \rangle = 2$  (C) and  $\langle k \rangle = 8$  (D) Random interaction matrices and small-world network structure were considered.  $s_{\max}$  was set to 0.5. The number of samples was set to 300.

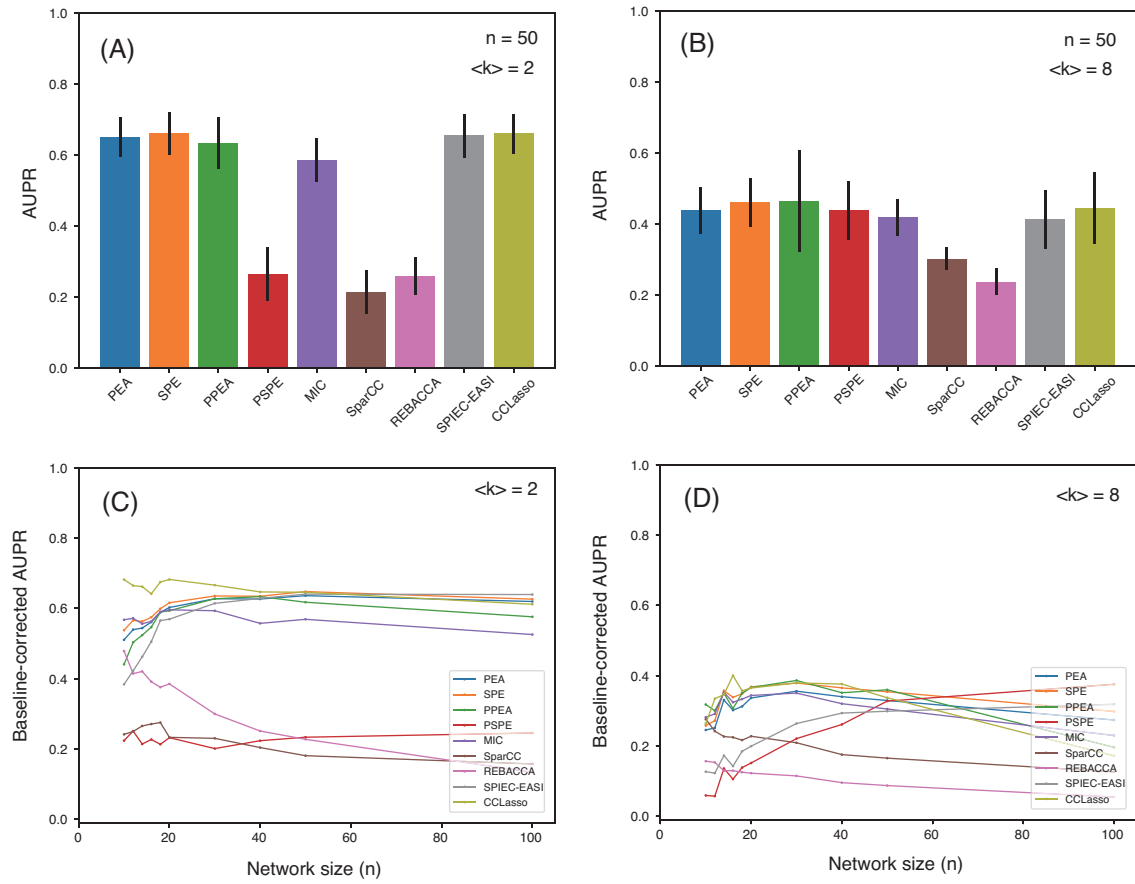

**Figure S5:** Differences in co-occurrence network performance between methods. AUPR values for 50-node networks with average degree  $\langle k \rangle = 2$  (A) and  $\langle k \rangle = 8$  (B) Error bars indicate standard deviations. Relationships between the baseline-corrected AUPR value and network size  $n$  for  $\langle k \rangle = 2$  (C) and  $\langle k \rangle = 8$  (D) Random interaction matrices and scale-free network structure were considered.  $s_{\max}$  was set to 0.5. The number of samples was set to 300.

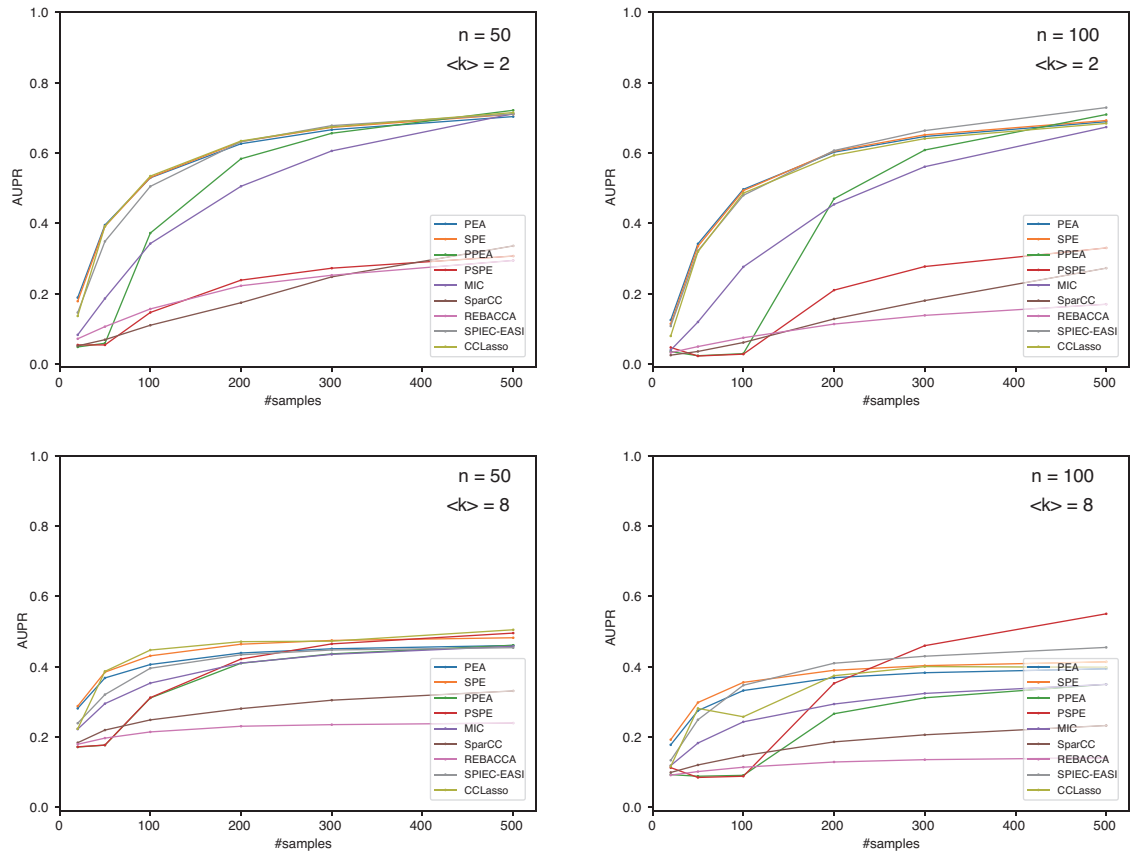

**Figure S6:** Relationships between co-occurrence network performance (AUPR value) and number of samples. Network size  $n = 50$  (left panels) and  $n = 100$  (right panels). Average degree  $\langle k \rangle = 2$  (top panels) and  $\langle k \rangle = 8$  (bottom panels). Random interaction matrices and random network structure were considered.  $s_{\max}$  was set to 0.5. The number of samples was set to 300.

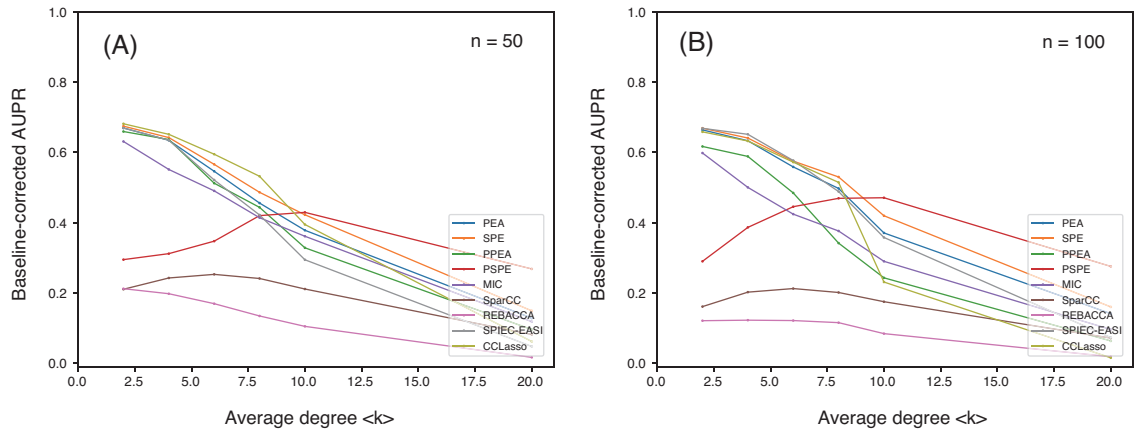

**Figure S7:** Relationships between co-occurrence network performance (baseline-corrected AUPR value) average degree when network size  $n = 50$  (A) and  $n = 100$  (B). Random interaction matrices and small-world network structure were considered.  $s_{\max}$  was set to 0.5. The number of samples was set to 300.

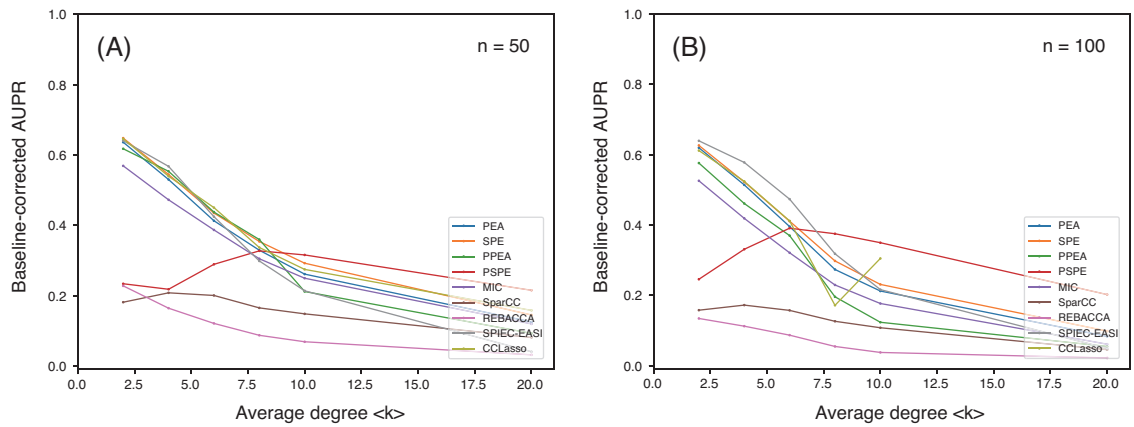

**Figure S8:** Relationships between co-occurrence network performance (baseline-corrected AUPR value) and average degree when network size  $n = 50$  (A) and  $n = 100$  (B). Random interaction matrices and scale-free network structure were considered.  $s_{\max}$  was set to 0.5. The number of samples was set to 300. The baseline-corrected AUPR values of CCLasso were not calculated when  $\langle k \rangle > 10$  in 100-node networks because of high computational costs.



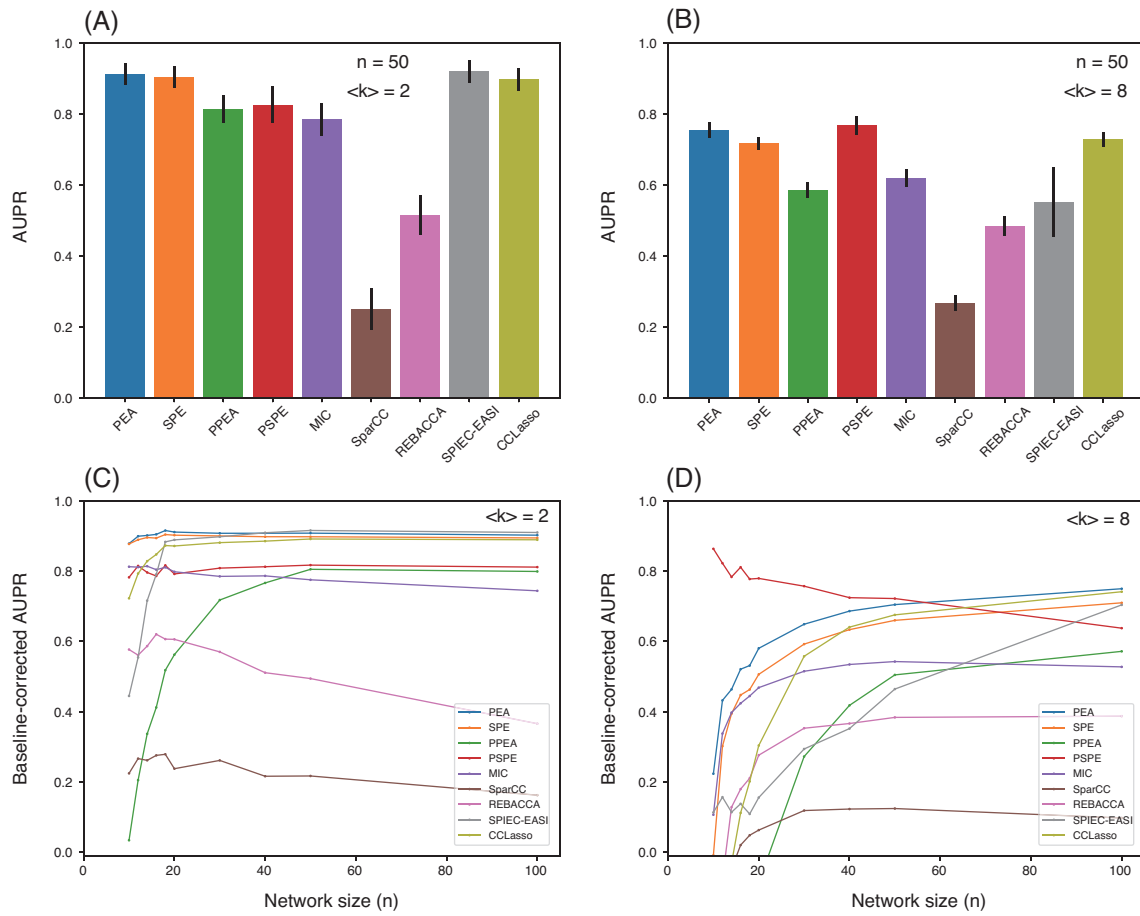

**Figure S9:** Differences in co-occurrence network performance between methods. AUPR values for 50-node networks with average degree  $\langle k \rangle = 2$  (A) and  $\langle k \rangle = 8$  (B). Error bars indicate standard deviations. Relationships between the baseline-corrected AUPR value and network size  $n$  for  $\langle k \rangle = 2$  (C) and  $\langle k \rangle = 8$  (D). Competitive interaction matrices and random network structure were considered.  $s_{\max}$  was set to 0.5. The number of samples was set to 300.

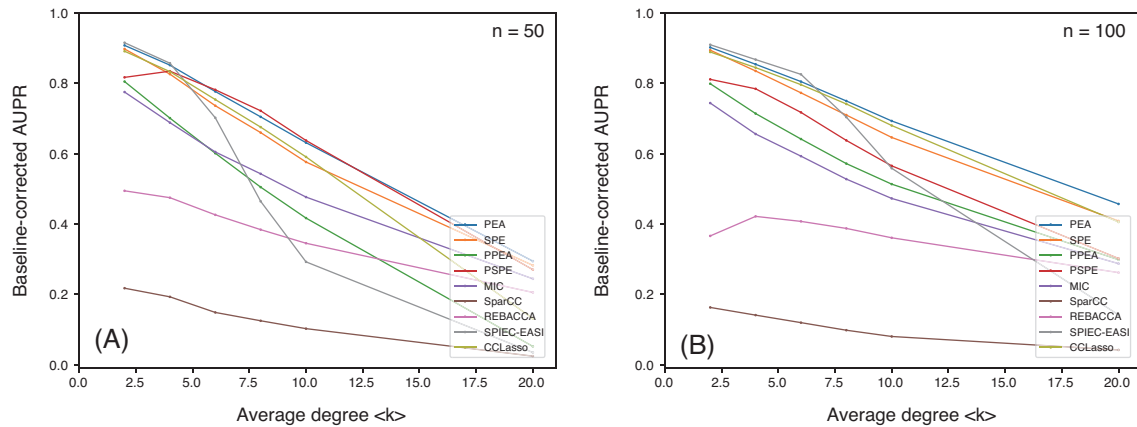

**Figure S10:** Relationships between co-occurrence network performance (baseline-corrected AUPR value) and average degree when network size  $n = 50$  (A) and  $n = 100$  (B). Competitive interaction matrices and random network structure were considered.  $s_{\max}$  was set to 0.5. The number of samples was set to 300. The baseline-corrected AUPR values of CCLasso were not calculated when  $\langle k \rangle > 10$  in 100-node networks because of high computational costs.

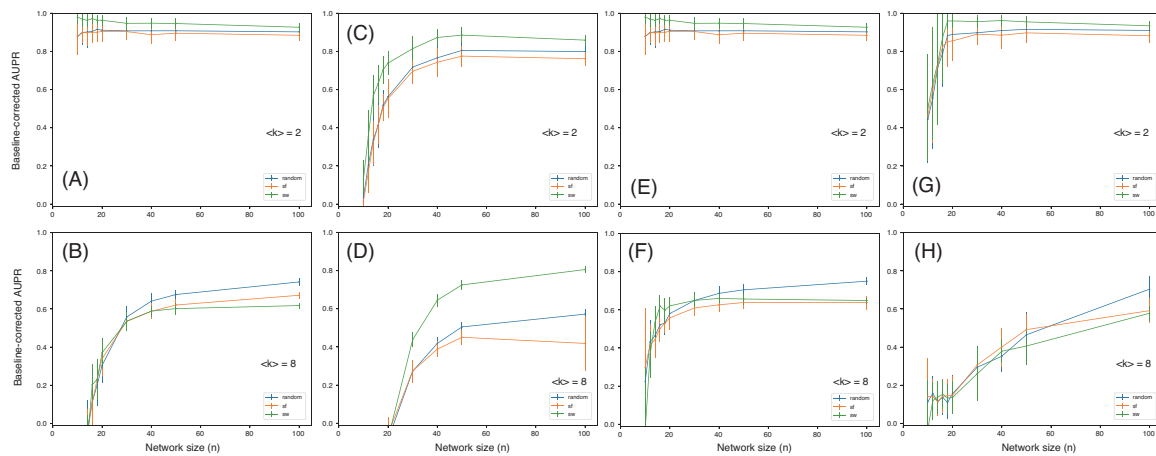

**Figure S11:** Relationships between co-occurrence network performance (AUPR value) and network size (the number of species) according to the network types: random networks (random), scale-free networks (sf), and small-world networks (sw). Competitive interaction matrices were considered. The cases of sparse networks ( $\langle k \rangle = 2$ ; top panels) and dense networks ( $\langle k \rangle = 8$ ; bottom panels) are shown. As representative examples, Pearson's correlation-based method (A and B), Pearson's partial correlation-based method (C and D), CCLasso (E and F), and SPIEC-EASI (G and H) are shown.  $s_{\max}$  was set to 0.5. The number of samples was set to 300. Error bars indicate standard deviations.

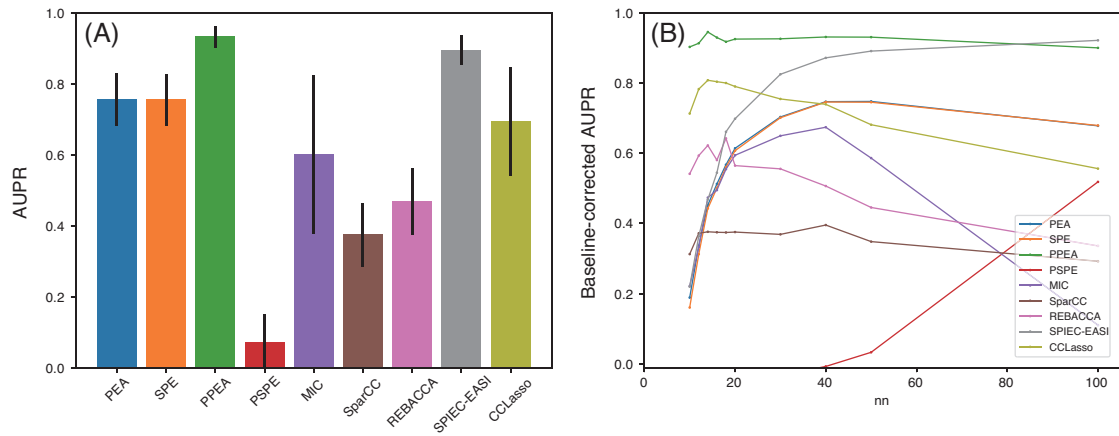

**Figure S12:** Differences in co-occurrence network performance between methods. (A) AUPR values for 50-node networks with average degree  $\langle k \rangle = 2$ . Error bars indicate standard deviations. (B) Relationship between the baseline-corrected AUPR value and network size  $n$  for  $\langle k \rangle = 2$ . Mutualistic interaction matrices and random network structure were considered.  $s_{\max}$  was set to 0.5. The number of samples was set to 300.

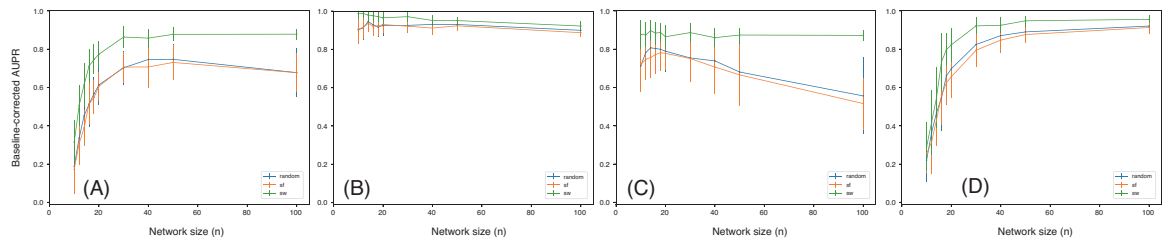

**Figure S13:** Relationships between co-occurrence network performance (AUPR value) and network size (the number of species) according to network type: random networks (random), scale-free networks (sf), and small-world networks (sw). Mutualistic interaction matrices were considered. Average degree  $\langle k \rangle = 2$ . As representative examples, Pearson's correlation-based method (A), Pearson's partial correlation-based method (B), CCLasso (C), and SPEIC-EASI (D) are shown.  $s_{\max}$  was set to 0.5. The number of samples was set to 300. Error bars indicate standard deviations.

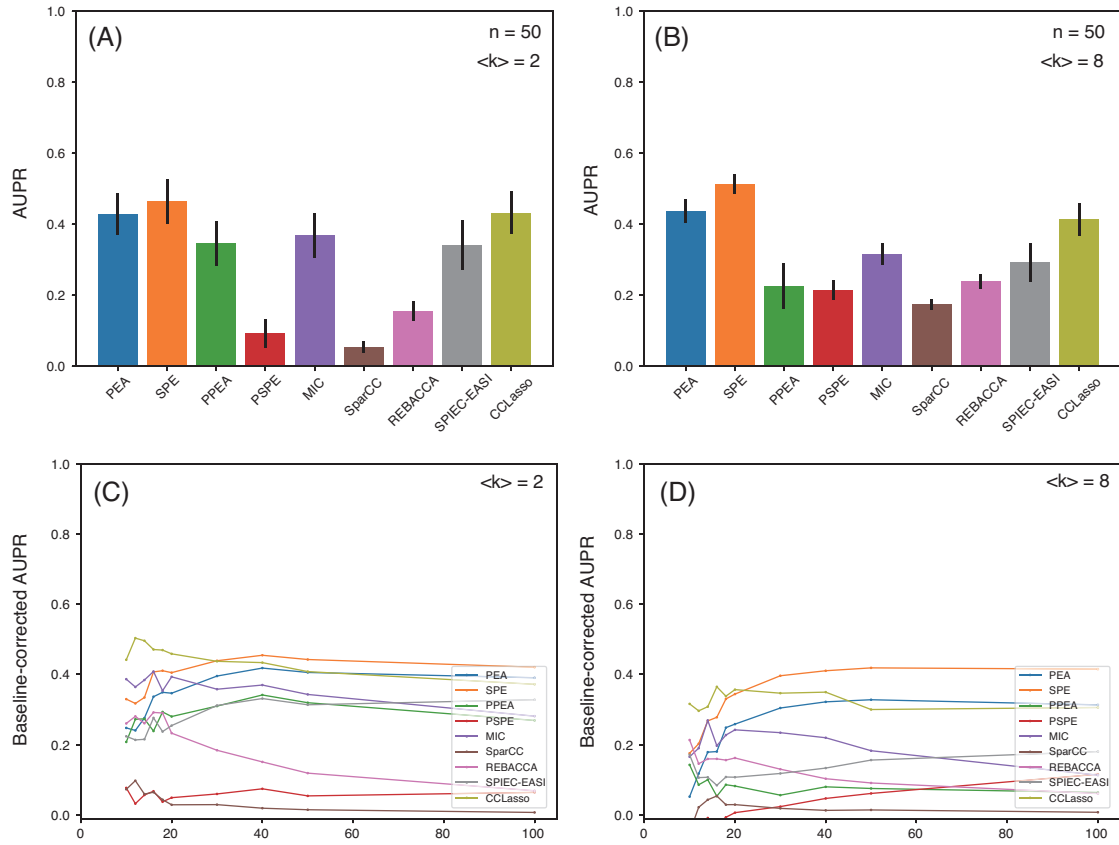

**Figure S14:** Differences in co-occurrence network performance between methods. AUPR values for 50-node networks with average degree  $\langle k \rangle = 2$  (A) and  $\langle k \rangle = 8$  (B). Error bars indicate standard deviations. Relationships between the baseline-corrected AUPR value and network size  $n$  for  $\langle k \rangle = 2$  (C) and  $\langle k \rangle = 8$  (D). Predator–prey (parasitic) interaction matrices and random network structure were considered.  $s_{\max}$  was set to 0.5. The number of samples was set to 300.

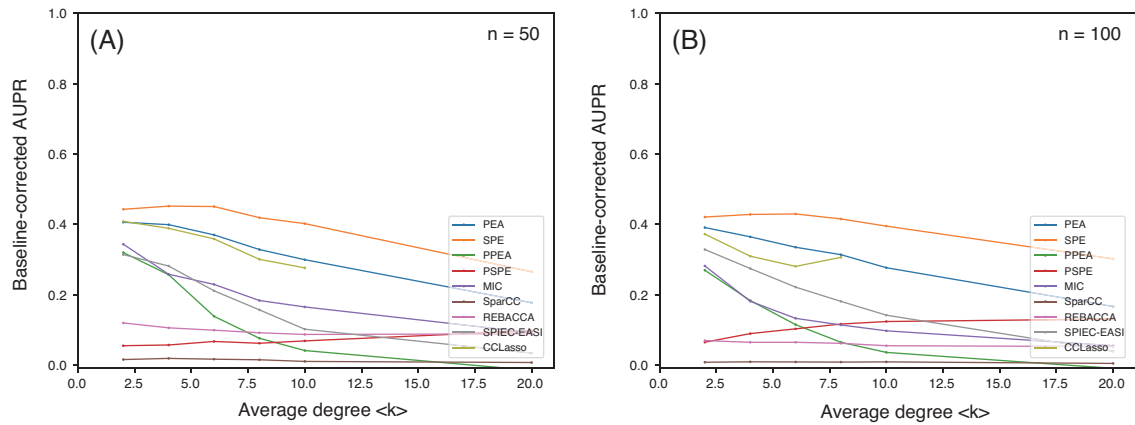

**Figure S15:** Relationships between co-occurrence network performance (baseline-corrected AUPR value) and average degree when network size  $n = 50$  (A) and  $n = 100$  (B). Predator–prey (parasitic) interaction matrices and random network structure were considered.  $s_{\max}$  was set to 0.5. The number of samples was set to 300. The baseline-corrected AUPR values of CCLasso were not calculated when  $\langle k \rangle > 10$  in (B) because of high computational costs.

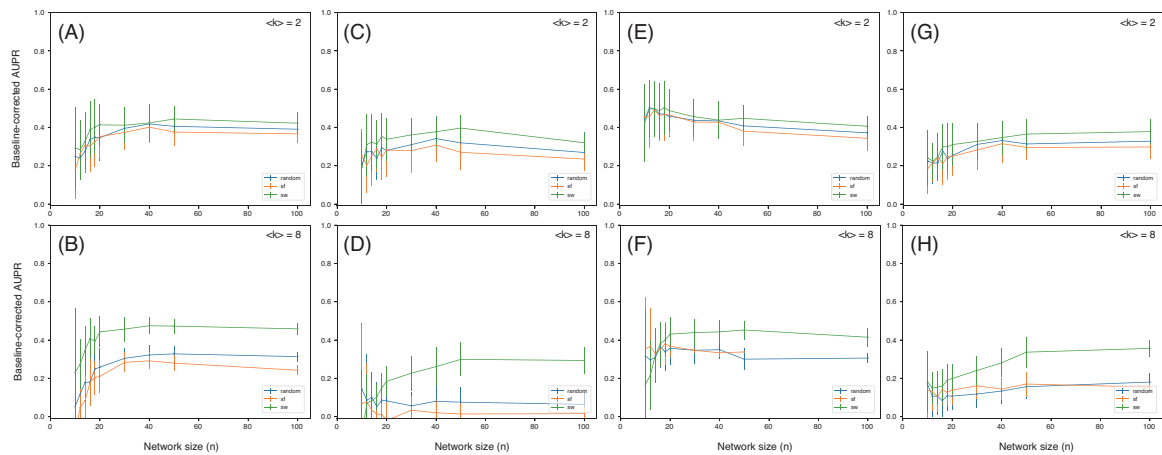

**Figure S16:** Relationships between co-occurrence network performance (AUPR value) and network size (the number of species) according to the network types: random networks (random), scale-free networks (sf), and small-world networks (sw). Predator–prey (parasitic) interaction matrices were considered. The cases of sparse networks ( $\langle k \rangle = 2$ ; top panels) and dense networks ( $\langle k \rangle = 8$ ; bottom panels) are shown. As representative examples, Pearson's correlation-based method (A and B), Pearson's partial correlation-based method (C and D), CCLasso (E and F), and SPEIC-EASI (G and H) are shown.  $s_{\max}$  was set to 0.5. The number of samples was set to 300. The baseline-corrected AUPR values for scale-free networks of were not calculated when  $n > 50$  in (F) due to high computational costs.

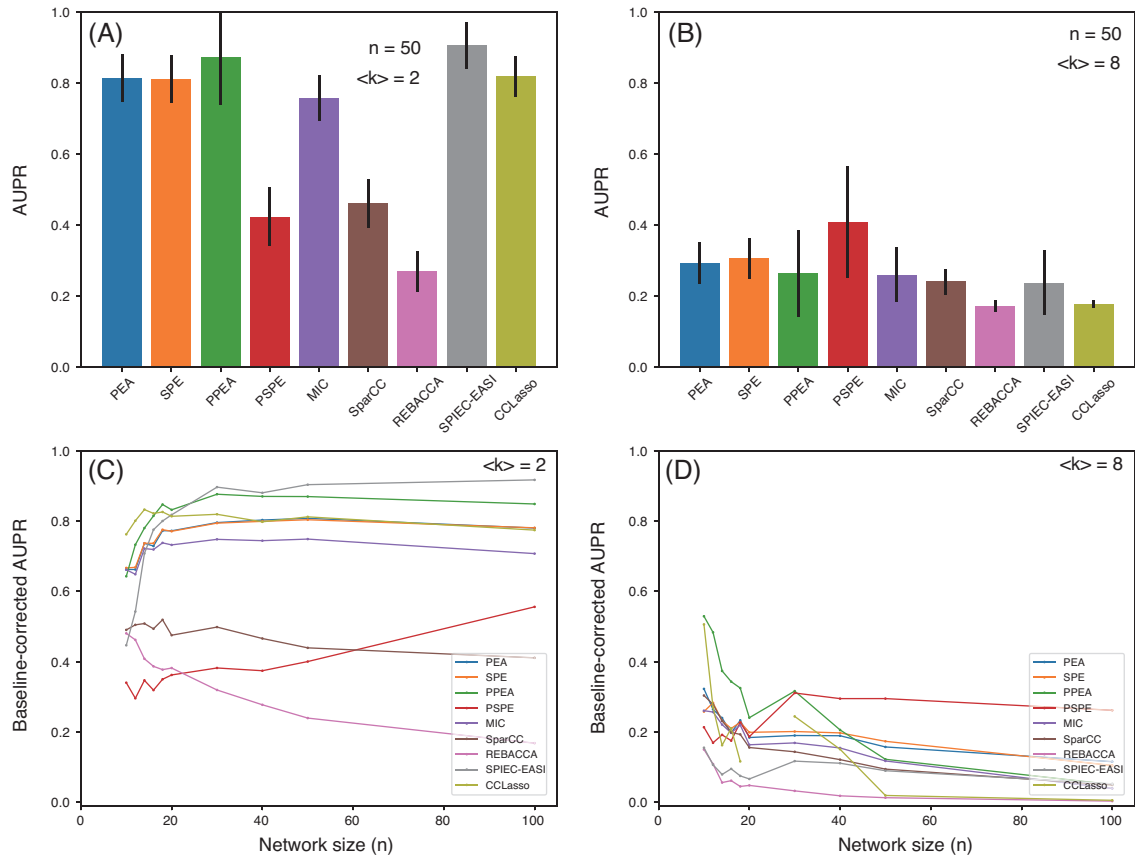

**Figure S17:** Differences in co-occurrence network performance between methods. AUPR values for 50-node networks with average degree  $\langle k \rangle = 2$  (A) and  $\langle k \rangle = 8$  (B). Error bars indicate standard deviations. Relationships between the baseline-corrected AUPR value and network size  $n$  for  $\langle k \rangle = 2$  (C) and  $\langle k \rangle = 8$  (D). Mutualism-competition mixture interaction matrices and random network structure were considered.  $s_{\max}$  was set to 0.5. The number of samples was set to 300.

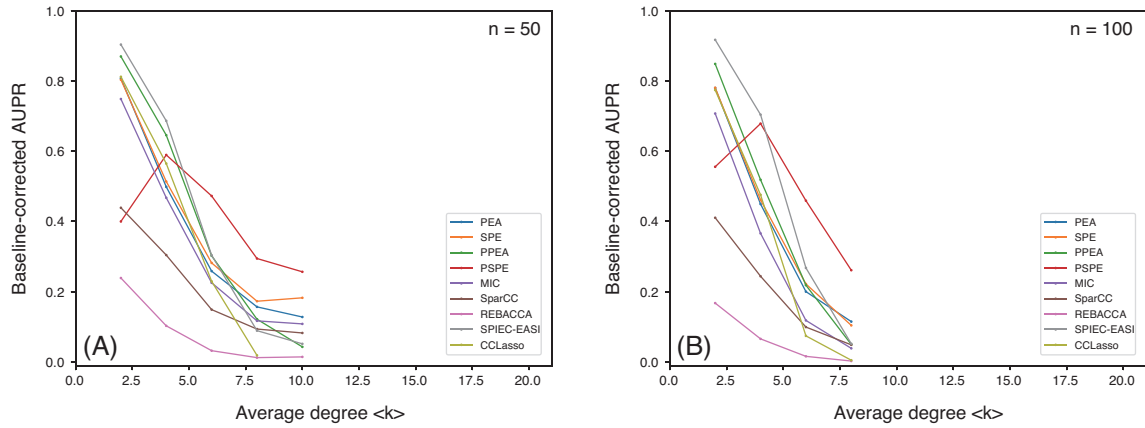

**Figure S18:** Relationships between co-occurrence network performance (baseline-corrected AUPR value) and average degree when network size  $n = 50$  (A) and  $n = 100$  (B). Mutualism-competition mixture interaction matrices and random network structure were considered.  $s_{\max}$  was set to 0.5. The number of samples was set to 300.

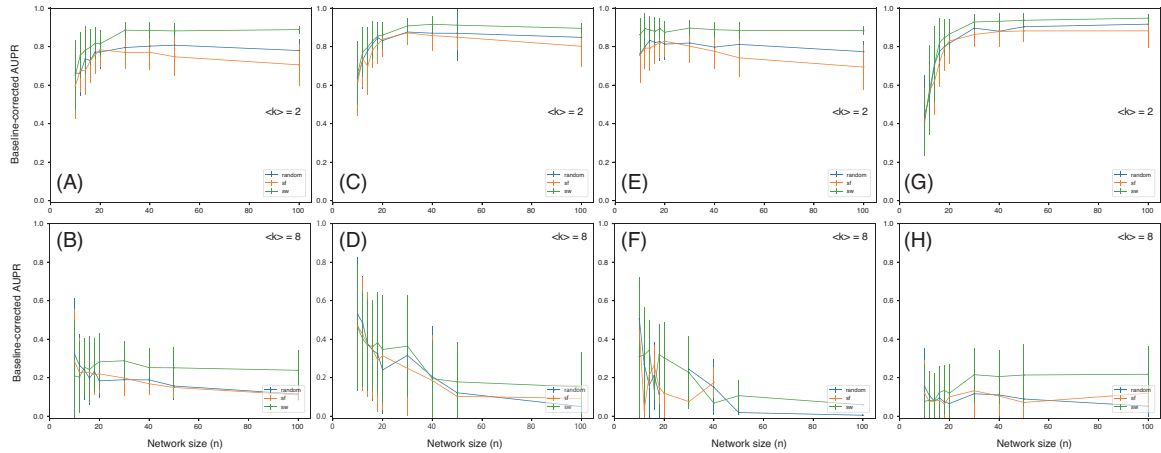

**Figure S19:** Relationships between co-occurrence network performance (AUPR value) and network size  $n$  according to the network types: random networks (random), scale-free networks (sf), and small-world networks (sw). Mutualism-competition mixture interaction matrices were considered. The cases of sparse networks ( $\langle k \rangle = 2$ ; top panels) and dense networks ( $\langle k \rangle = 8$ ; bottom panels) are shown. As representative examples, Pearson's correlation-based method (A and B), Pearson's partial correlation-based method (C and D), CCLasso (E and F), and SPEIC-EASI (G and H) are shown.  $s_{\max}$  was set to 0.5. The number of samples was set to 300. The baseline-corrected AUPR values for scale-free networks of were not calculated when  $n > 40$  in (F) due to high computational costs.

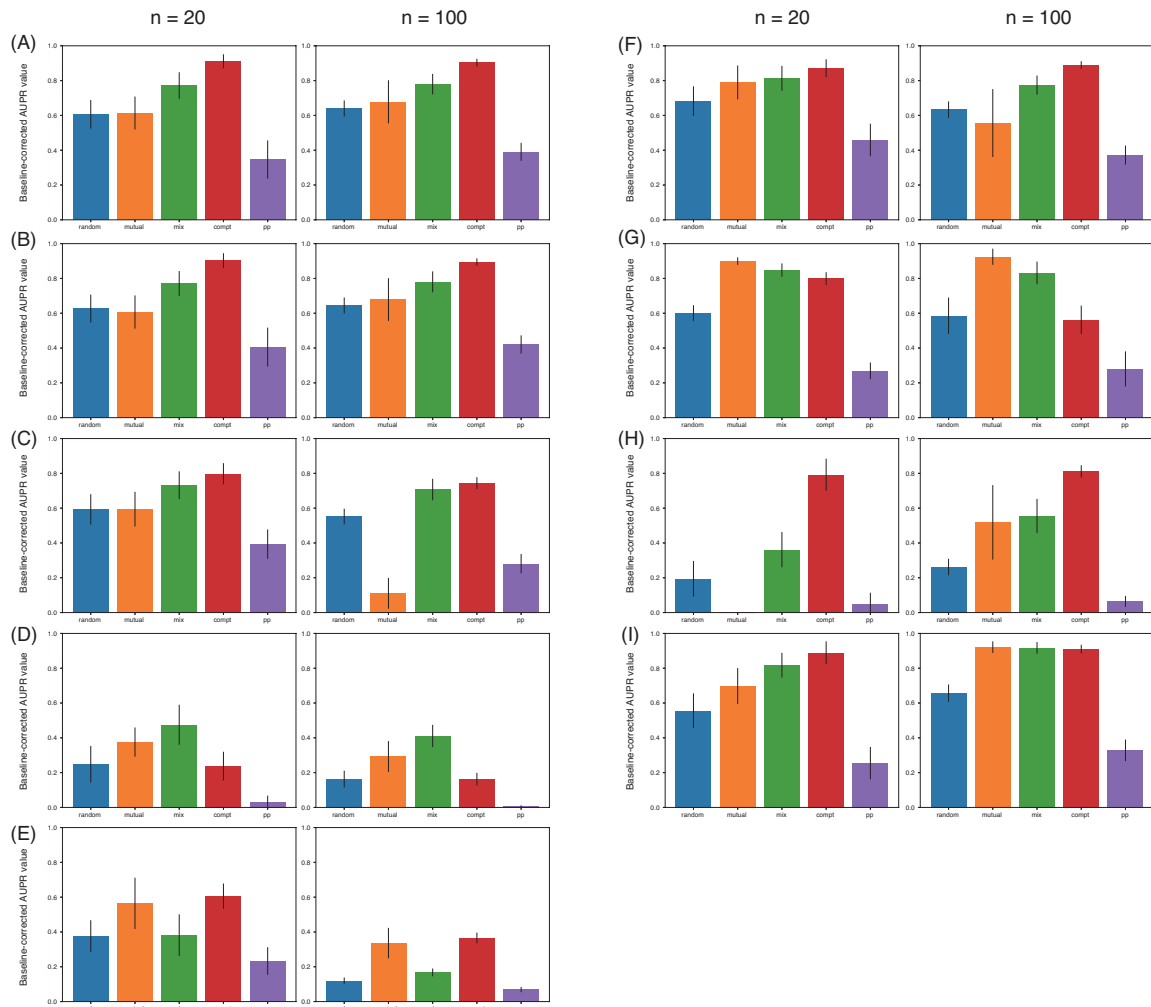

**Figure S20:** Effects of community type on co-occurrence network performance (baseline-corrected AUPR value) in Pearson's correlation-based method (A), Spearman's correlation-based method (B), MIC-based method (C), SparCC (D), REBACCA(E), CCLasso (F), Pearson's partial correlation-based method (G), Spearman's correlation-based method (H), and SPEIC-EASI (I). Vertical-axis labels correspond to the community types: random community (random), mutualistic community (mutual), competition-mutualism mixture community (mix), competitive community (compt), and predator-prey (parasitic) community (pp). The cases in which network size  $n = 100$  and  $n = 20$  are shown. Average degree  $\langle k \rangle = 2$ . Random network structure was considered.  $S_{\max}$  was set to 0.5. The number of samples was set to 300. Error bars indicate standard deviations.



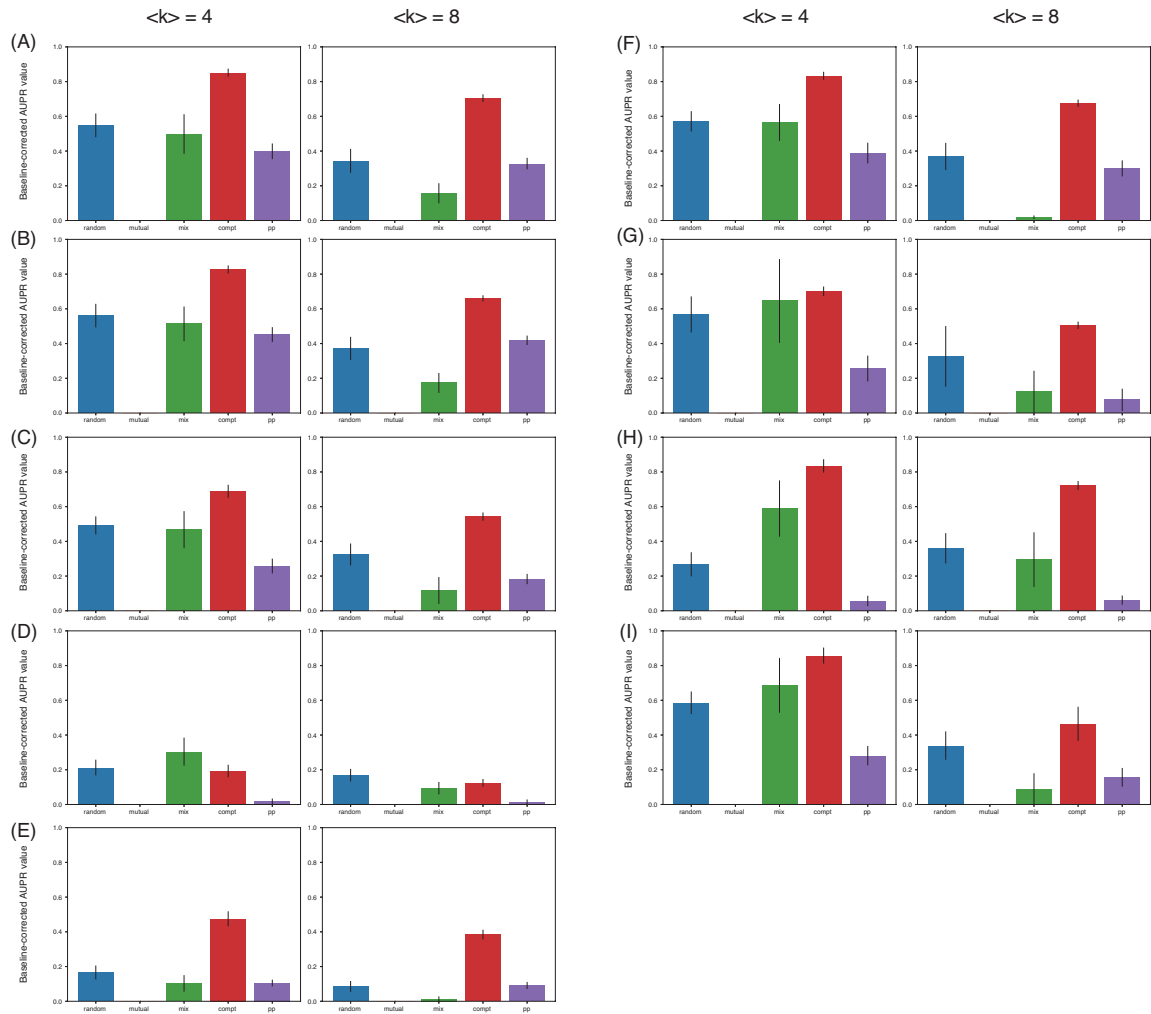

**Figure S21:** Effects of community type on co-occurrence network performance (baseline-corrected AUPR value) in Pearson's correlation-based method (A), Spearman's correlation-based method (B), MIC-based method (C), SparCC (D), REBACCA(E), CCLasso (F), Pearson's partial correlation-based method (G), Spearman's correlation-based method (H), and SPEIC-EASI (I). Vertical-axis labels correspond to the community types: random community (random), mutualistic community (mutual), competition-mutualism mixture community (mix), competitive community (compt), and predator-prey (parasitic) community (pp). The cases in which average degree  $\langle k \rangle = 4$  and  $\langle k \rangle = 8$  and network size  $n = 100$  are shown. Random network structure was considered.  $s_{\max}$  was set to 0.5. The number of samples was set to 300. The baseline-corrected AUPR values for mutualistic communities were not calculated because of numerical divergence in the simulation of the GLV equations. Error bars indicate standard deviations.

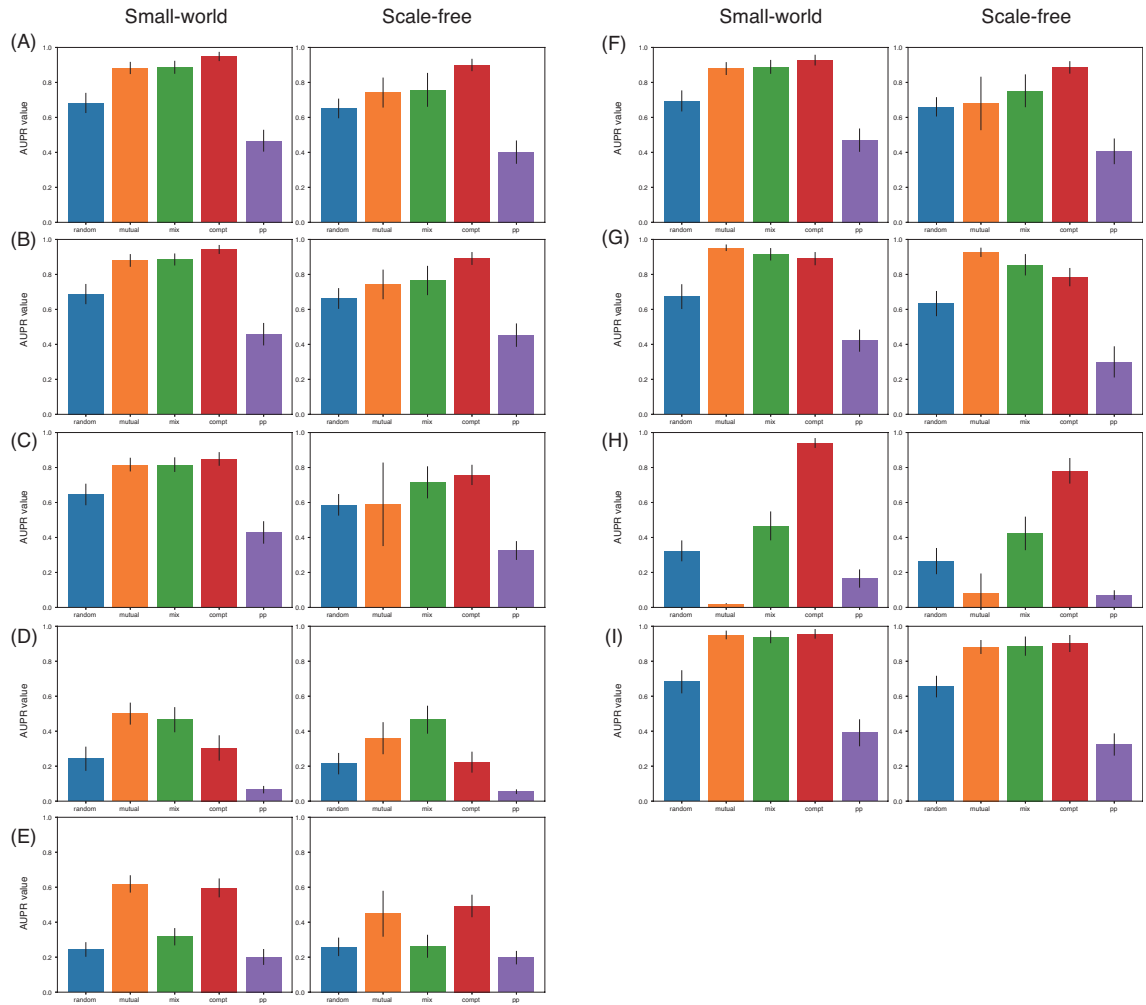

**Figure S22:** Effects of community type on co-occurrence network performance (baseline-corrected AUPR value) in Pearson's correlation-based method (A), Spearman's correlation-based method (B), MIC-based method (C), SparCC (D), REBACCA(E), CCLasso (F), Pearson's partial correlation-based method (G), Spearman's correlation-based method (H), and SPEIC-EASI (I). Vertical-axis labels correspond to the community types: random community (random), mutualistic community (mutual), competition-mutualism mixture community (mix), competitive community (compt), and predator-prey (parasitic) community (pp). The cases of small-world networks and scale-free networks are shown. Network size  $n = 100$  and average degree  $\langle k \rangle = 2$ . Random network structure was considered.  $s_{\max}$  was set to 0.5. The number of samples was set to 300. Error bars indicate standard deviations.
